# Supplementary material
Source: Elsevier journal article supplement (https://www.sciencedirect.com/science/article/pii/S1885585714001133)
Supplement: mmc1 [file mmc1.pdf]

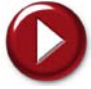

Supplementary material

---

## Red Cell Distribution Width and Additive Risk Prediction for Major Bleeding in Non–ST-segment Elevation Acute Coronary Syndrome

Marianela Sánchez-Martínez,<sup>a</sup> Ángel López-Cuenca,<sup>b</sup> Francisco Marín,<sup>a</sup>  
Pedro J. Flores-Blanco,<sup>a</sup> Andrea García Narbon,<sup>b</sup> Jose I. de las Heras-Gómez,<sup>b</sup>  
María J. Sánchez-Galian,<sup>a</sup> Mariano Valdes,<sup>a,d</sup> James L. Januzzi,<sup>e</sup>  
and Sergio Manzano-Fernández<sup>a,d,\*</sup>

<sup>a</sup>*Departamento de Cardiología, Hospital Clínico Universitario Virgen de la Arrixaca, El Palmar, Murcia, Spain*

<sup>b</sup>*Departamento de Medicina Interna, Hospital de la Vega Lorenzo Guirao, Cieza, Murcia, Spain*

<sup>c</sup>*Departamento de Bioquímica, Hospital Clínico Universitario Virgen de la Arrixaca, El Palmar, Murcia, Spain*

<sup>d</sup>*Universidad de Murcia, Murcia, Spain*

<sup>e</sup>*Division of Cardiology, Massachusetts General Hospital, Boston, Massachusetts, United States*

---

**Table 1**

Study Population Clinical Characteristics as a Function of Red Cell Distribution Width Quartiles

| RDW %                                            |                  |                   |                 |                  |       |
|--------------------------------------------------|------------------|-------------------|-----------------|------------------|-------|
| Variables                                        | Q1<br>N = 85     | Q2<br>N = 75      | Q3<br>N = 66    | Q4<br>N = 67     | P     |
| Range                                            | 12 to 13.2%      | 13.3 vto<br>13.9% | 14 to 14.9%     | 15 to 21.8%      |       |
| Age, mean (SD), y                                | 65 (13)          | 69 (11)           | 68 (11)         | 71 (12)          | .03   |
| Age >75 years                                    | 24 (28)          | 27 (36)           | 19 (29)         | 28 (42)          | .17   |
| Sex (male)                                       | 66 (78)          | 58 (77)           | 40 (61)         | 38 (57)          | .001  |
| Body mass index, mean (SD),<br>Kg/m <sup>2</sup> | 29 (3)           | 29 (4)            | 29 (4)          | 30 (5)           | .38   |
| Systolic blood pressure, mmHg                    | 140<br>[121-160] | 137<br>[122-156]  | 140<br>[125-15] | 140<br>[121-166] | .68   |
| Heart rate, beat/min                             | 70<br>[60-80]    | 78<br>[67-90]     | 79<br>[70-93]   | 80<br>[72-100]   | <.001 |
| Diabetes mellitus                                | 39 (46)          | 25 (33)           | 36 (55)         | 44 (66)          | .003  |
| Hypertension                                     | 60 (71)          | 61 (81)           | 51 (77)         | 64 (96)          | .001  |
| Hyperlipidemia                                   | 42 (49)          | 43 (57)           | 45 (68)         | 45 (67)          | .010  |
| Current smoking                                  | 20 (24)          | 25 (33)           | 18 (27)         | 9 (13)           | .14   |
| Previous non-ST elevation<br>ACS                 | 29 (34)          | 20 (27)           | 13 (20)         | 25 (37)          | .99   |

|                                                                  |                                         |                                         |                                  |                                  |       |
|------------------------------------------------------------------|-----------------------------------------|-----------------------------------------|----------------------------------|----------------------------------|-------|
| Previous STEMI                                                   | 24 (28)                                 | 8 (11)                                  | 9 (14)                           | 17 (25)                          | .63   |
| Atrial fibrillation/flutter                                      | 5 (6)                                   | 6 (8)                                   | 7 (11)                           | 9 (13)                           | .09   |
| Previous stroke                                                  | 7 (8)                                   | 4 (5)                                   | 4 (6)                            | 13 (19)                          | .04   |
| Previous heart failure                                           | 5 (5)                                   | 2 (3)                                   | 1 (1.5)                          | 6 (9)                            | .33   |
| Ejection Fraction                                                | 60<br>[50-65]                           | 60<br>[51-67]                           | 60<br>[50-65]                    | 59<br>[45-65]                    | .52   |
| Ejection Fraction > 50%                                          | 60 (76)                                 | 60 (85)                                 | 49 (77)                          | 46 (70)                          | .27   |
| Peripheral artery disease                                        | 5 (6)                                   | 9 (12)                                  | 4 (6)                            | 10 (15)                          | .15   |
| eGFR, mL/min/1.73 <sup>2</sup>                                   | 79 [63-109]                             | 73 [59-96]                              | 73 [59-102]                      | 62 [48-91]                       | .008  |
| <i>Hemoglobin, mean (SD), g/dL</i>                               | 14.4 (1.4)                              | 14.2 (1.5)                              | 13.6 (1.8)                       | 12.3 (2.2)                       | <.001 |
| <i>Hematocrit, mean (SD), %</i>                                  | 45 (4)                                  | 42 (5)                                  | 40 (6)                           | 36 (6)                           | <.001 |
| <i>MCV, mean (SD), fL</i>                                        | 89 (4)                                  | 90 (4)                                  | 89 (5)                           | 84 (7)                           | <.001 |
| <i>Troponin T, ng/mL</i>                                         | 0.06<br>[0.01-0.07]                     | 0.06<br>[0.01-0.51]                     | 0.09<br>[0.01-1.67]              | 0.03<br>[0.01-0.23]              | .41   |
| <i>C- reactive protein (mg/dL)</i>                               | 0.5 [0.2-1.4]                           | 0.6 [0.3-4.1]                           | 0.7 [0.4-3.1]                    | 1.1 [0.4-3.2]                    | .05   |
| CRUSADE risk score, mean (SD)                                    | 24 (13)                                 | 26 (13)                                 | 30 (15)                          | 38 (15)                          | <.001 |
| Number of vessel disease<br><i>0-VD / 1-VD / 2-VD / 3-VD±LMD</i> | 8 (13)/ 23<br>(38)/ 17<br>(28)/ 12 (20) | 9 (16)/ 15<br>(30)/ 12 (24)/<br>15 (30) | 3 (8)/13 (33)/ 9<br>(23)/14 (36) | 6 (17)/3 (8)/ 11<br>(31)/16 (44) | .12   |
| Revascularization                                                | 59 (69)                                 | 53 (71)                                 | 47 (71)                          | 31 (46)                          | .008  |
| <i>PCI-S / CABG</i>                                              | 54 (64) / 5                             | 47 (63) / 6 (8)                         | 43 (65) / 4 (6)                  | 25 (37) / 6 (9)                  | .24   |

|                                         |                          |                     |                      |                      |      |
|-----------------------------------------|--------------------------|---------------------|----------------------|----------------------|------|
| DES / BMS                               | (6)                      | 39 (52) / 8         | 36 (55) / 7 (11)     | 18 (27) / 6 (9)      | .15  |
| Femoral vascular access                 | 49 (56) / 6              | (11)                | 17 (26)              | 21 (31)              | .35  |
| Use of Iib/IIIa glycoprotein inhibitors | (7)<br>26 (31)<br>9 (11) | 17 (23)<br>7 (9)    | 7 (11)               | 2 (3)                | .27  |
| Final diagnosis: UA / NSTEMI            | 25 (29) / 60<br>(71)     | 2 (29) / 53<br>(71) | 21 (32) / 45<br>(68) | 24 (36) / 43<br>(64) | .38  |
| <i>Aspirin</i>                          | 78 (96)                  | 72 (96)             | 64 (100)             | 58 (92)              | .45  |
| <i>Clopidogrel</i>                      | 72 (89)                  | 63 (84)             | 54 (84)              | 44 (70)              | .006 |
| <i>•-blocker</i>                        | 72 (89)                  | 68 (91)             | 55 (86)              | 56 (89)              | .78  |
| <i>ACE inhibitors/ARB</i>               | 70 (86)                  | 67 (89)             | 56 (88)              | 55 (87)              | .94  |
| <i>Statin</i>                           | 78 (96)                  | 74 (99)             | 62 (97)              | 60 (95)              | .64  |
| <i>Acenocumarol</i>                     | 4 (5)                    | 3 (4)               | 6 (9)                | 7 (11)               | .09  |

Unless otherwise indicated, the data are expressed No. (%).

ACE, angiotensin-converting enzyme; ACS, acute coronary syndrome; ARB, angiotensin-receptor blocker; BMS, bare metal stent; CABG, coronary artery bypass graft; DES, drug eluting stent; eGFR, glomerular filtration rate; STEMI, ST segment elevation myocardial infarction; LMD, left main disease; NSTEMI, non-ST segment elevation myocardial infarction; PCI-S, percutaneous coronary intervention with stent implantation; STEMI, ST segment elevation myocardial infarction, UA, unstable angina; VD, vessel disease,
